# Supplementary material for: Design of a ligand for cancer imaging with long blood circulation and an enhanced accumulation ability in tumors
Source: Royal Society of Chemistry journal article supplement (doi:10.1039/c7md00102a), 2017-01-01
Supplement: c7md00102a1.pdf [file c7md00102a1.pdf]

## Supporting Information

---

### **Ligand design for cancer imaging with long blood circulation and enhanced accumulation ability in tumors**

Elnaz Nakhaei, Chan Woo Kim, Daiki Funamoto, Hikari Sato, Yuta Nakamura, Akihiro Kishimura, Takeshi Mori, Yoshiki Katayama

#### **Characterization of folate-fluorophore conjugates (probe 1, 2 and 3)**

Purity analysis of the purified probes was carried out on an analytical reversed-phase high performance liquid chromatography (HPLC) system using C18 RP (100 × 4.6 mm 5 μm) column using a linear A-B gradient at a flow rate of 1 mL/min, where eluent A was 0.1% TFA in water and eluent B was 0.1% TFA in acetonitrile. B eluent with gradient of 25-70 in 45 minutes, 40-70% in 30 minutes and 20-50% in 30 minutes was run for the probe 1, 2 and 3, respectively. UV absorbance at 220, 552 nm and 740 nm was monitored. Calculated purity for the probes 1, 2 and 3 are 78%, 80% and 81%, respectively.

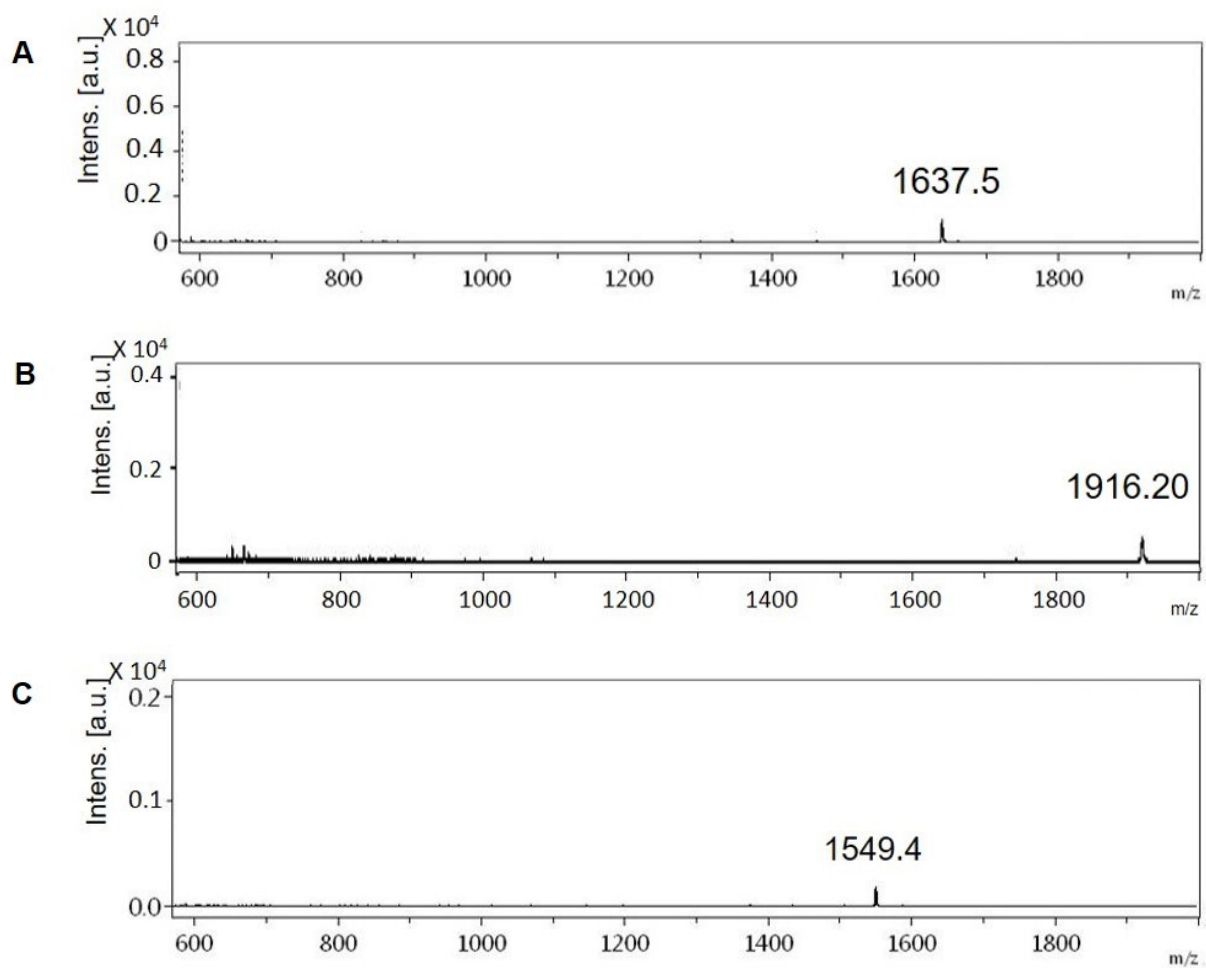

**Fig. S1** MALDI-TOF mass spectrum of the purified probes. (A) Probe 1 (MW: 1639.9) (B) Probe 2 (MW: 1915.3) (C) Probe 3 (MW: 1548.7)
